# Supplementary material
Source: MDPI journal article supplement (https://www.mdpi.com/1424-8247/17/2/213)
Supplement: s1 [file s1]

Measurement information

|                    |                        |                                 |                      |
|--------------------|------------------------|---------------------------------|----------------------|
| Measurement name   | Cholestrol             | User                            | admin                |
| Method             | -                      | Time                            | 1/21/2023 2:53:17 PM |
| Status             | Succeeded              | Instrument type                 | Litesizer 100        |
| Measurement mode   | Particle size          |                                 |                      |
| Measurement cell   | Disposable             | Filter opical density           | 3.461 (Automatic)    |
| Measurement angle  | Back scatter (Manual)  | Focus position                  | -3.7 mm (Automatic)  |
| Target temperature | 25.0 °C                | Material                        | Unknown material     |
| Equilibration time | 0h 01m 00s             | Material refractive index       | -                    |
| Analysis model     | General                | Material absorbance coefficient | -                    |
| Cumulant model     | Advanced               | Solvent                         | PBS                  |
| Processed runs     | 6 (Automatic)          | Solvent refractive index        | 1.3318               |
| Time for each run  | 0h 00m 10s (Automatic) | Solvent viscosity               | 0.0009041 Pa.s       |

Particle size distribution (intensity)

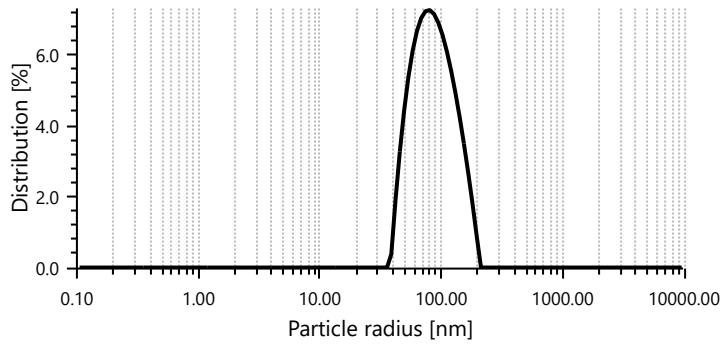

Results

|                       |                              |                    |                    |
|-----------------------|------------------------------|--------------------|--------------------|
| Hydrodynamic radius   | 86.11 nm                     | Mean intensity     | 303.2 kcounts/s    |
| Polydispersity index  | 22.6 %                       | Absolute intensity | 876109.5 kcounts/s |
| Diffusion coefficient | 2.8 $\mu\text{m}^2/\text{s}$ | Intercept $g1^2$   | 0.8277             |
| Transmittance         | 0.4 %                        | Baseline           | 1.001              |

Particle size distribution peaks (intensity)

| Peak name | Size [nm] | Area [%] | Standard deviation [nm] |
|-----------|-----------|----------|-------------------------|
| Peak 1    | 91.43     | 100.00   | 31.20                   |
| Peak 2    | -         | -        | -                       |
| Peak 3    | -         | -        | -                       |
